# Supplementary material for: Synthesis, chiroptical and SHG properties of polarizable push–pull dyes built on π-extended binaphthyls
Source: Royal Society of Chemistry journal article supplement (doi:10.1039/c4ra16876c), 2015-01-01

*Supporting Information for:*

# Synthesis, Chiroptical and SHG Properties of Polarizable Push-Pull Dyes Built on $\pi$ -Extended Binaphthyls

*Carmine Coluccini,<sup>a</sup> Marco Caricato,<sup>a</sup> Elena Cariati,<sup>b,c</sup> Stefania  
Righetto,<sup>b</sup> Alessandra Forni,<sup>c</sup> and Dario Pasini<sup>\*,a,d</sup>*

<sup>a</sup> Department of Chemistry, University of Pavia, Viale Taramelli, 10–27100 Pavia, Italy.

<sup>b</sup> Dipartimento di Chimica dell'Università degli Studi di Milano, UdR dell'INSTM, via Golgi 19, 20133 Milano, Italy.

<sup>c</sup> Istituto di Scienze e Tecnologie Molecolari – Consiglio Nazionale delle Ricerche (ISTM-CNR), Università degli Studi di Milano, UdR dell'INSTM, via C. Golgi 19, 20133 Milano, Italy.

<sup>d</sup> INSTM Research Unit, University of Pavia, Italy.

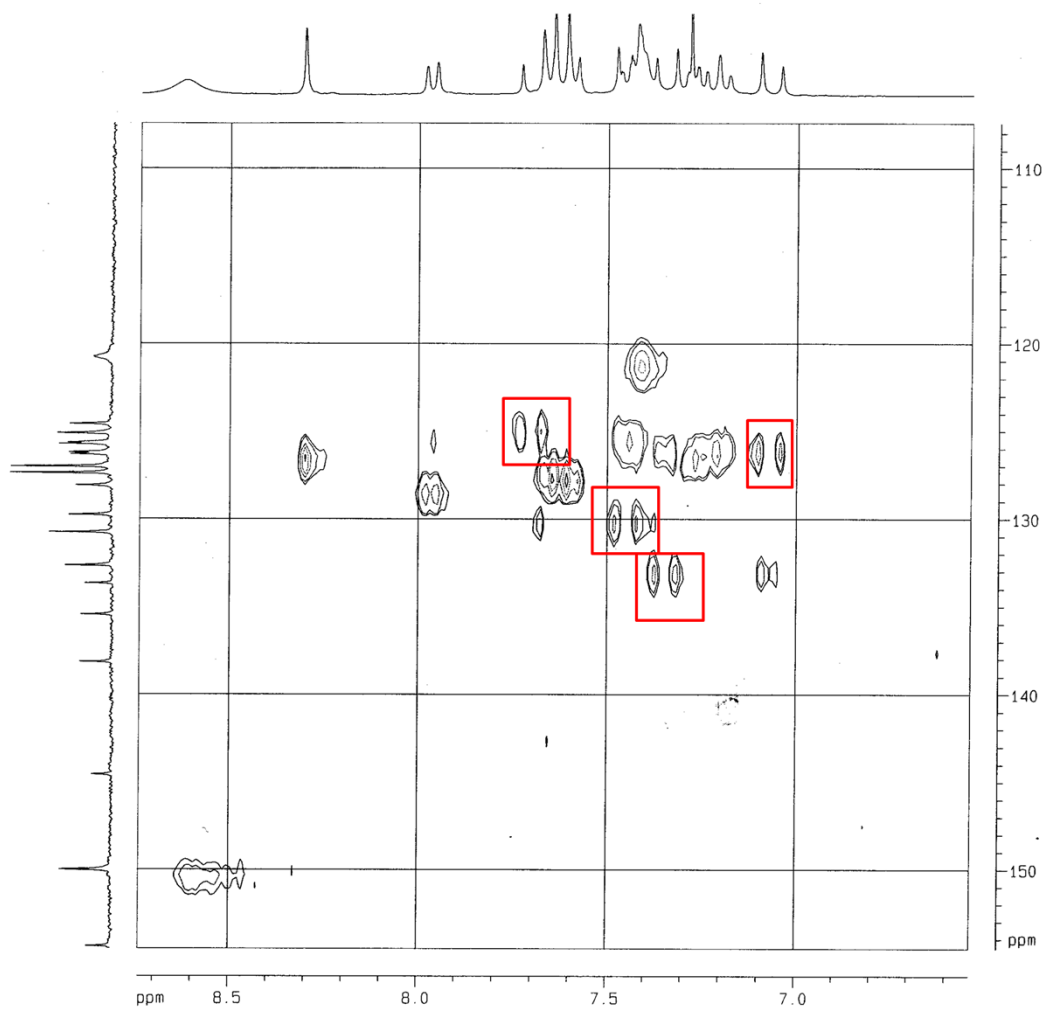

**Figure S1.** HETCOR 2D NMR experiment for compound (*R*)-**11** (CDCl<sub>3</sub>, 300 MHz, 25 °C).

Red boxes indicate the areas attributable to the four vinyl proton resonances.

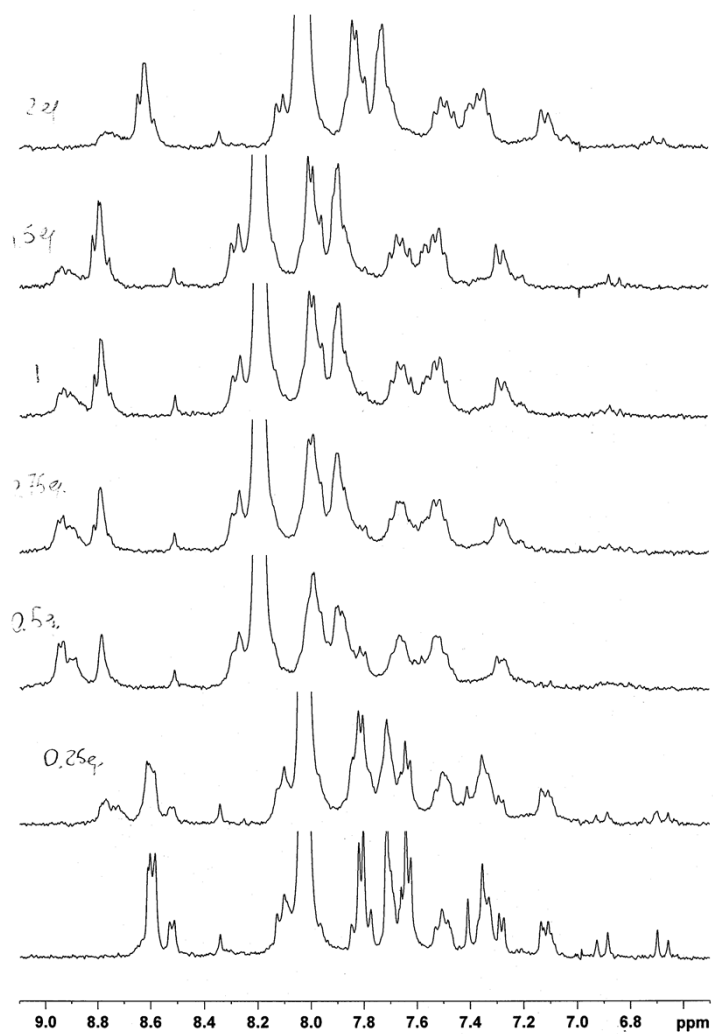

**Figure S2.** Titration of (*R*)-**11** with Pd(MeCN)<sub>2</sub>Cl<sub>2</sub> (*d*<sub>7</sub>-DMF, 300 MHz, 25 °C).

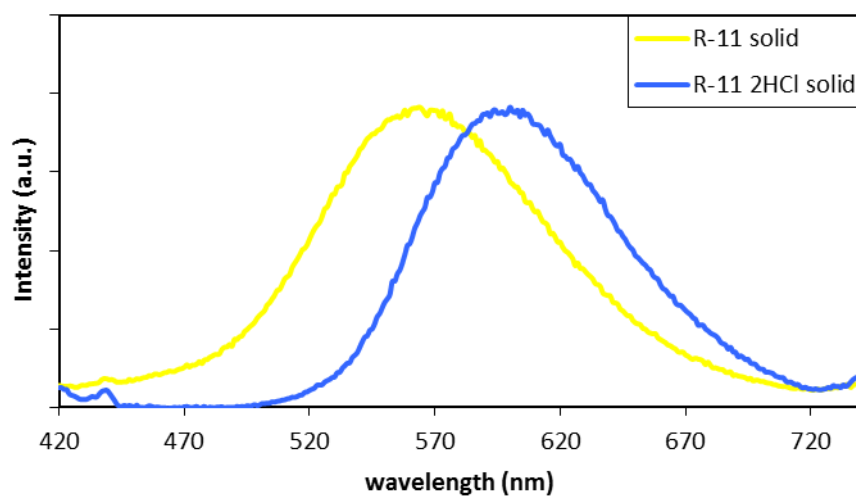

**Figure S3.** Normalized emission spectra of powders of **11** and **11.2HCl**.

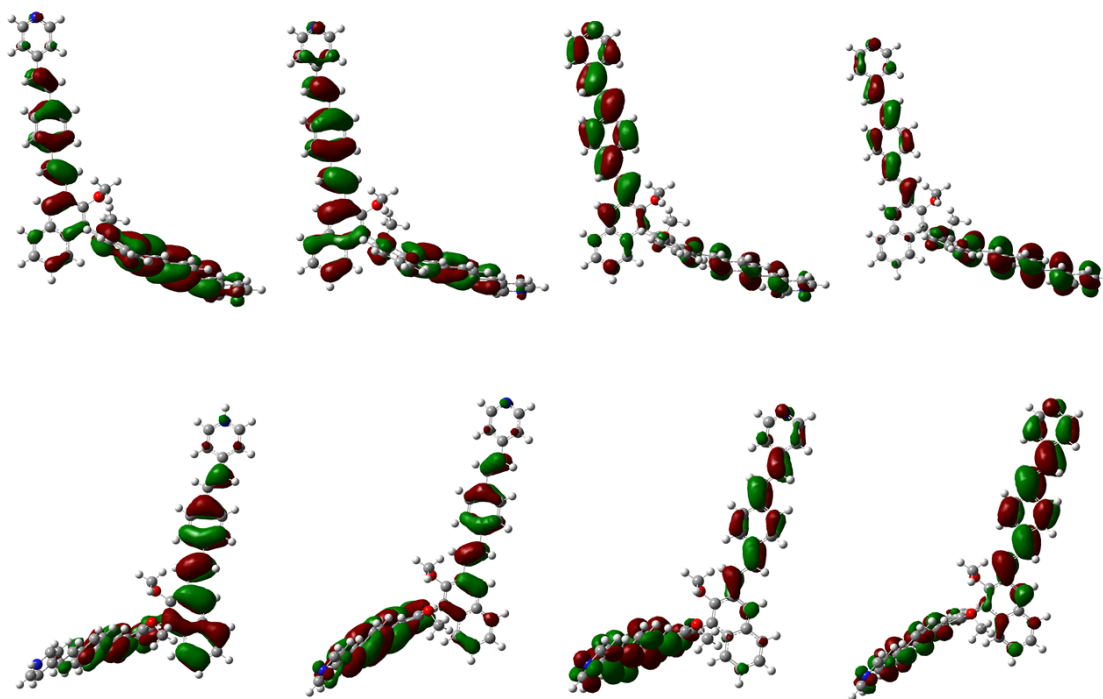

**Fig. S4.** Plots of the  $\omega$ B97X/6-311++G\*\* HOMO-1, HOMO, LUMO and LUMO+1 orbitals (from left to right) of compound **11** in  $\text{CHCl}_3$ , projected on the plane of one naphthalene arm (above) and on the plane of the other naphthalene arm (below). Isosurfaces value 0.02.

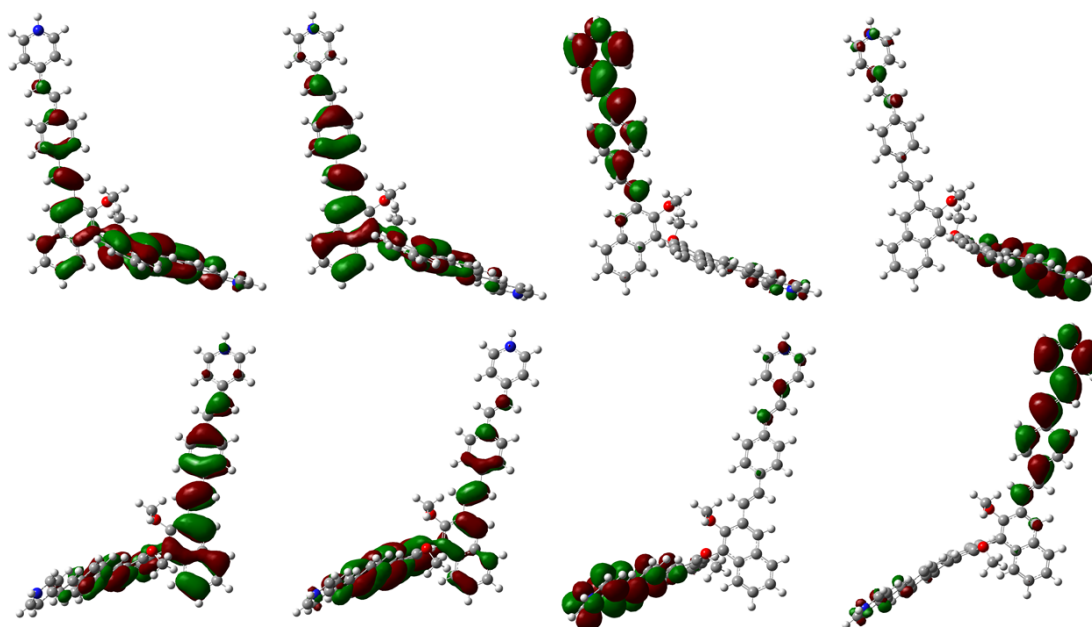

**Fig. S5.** Plots of the  $\omega$ B97X/6-311++G\*\* HOMO-1, HOMO, LUMO and LUMO+1 orbitals (from left to right) of compound **11** doubly protonated in  $\text{CHCl}_3$ , projected on the plane of one naphthalene arm (above) and on the plane of the other naphthalene arm (below). Isosurfaces value 0.02.

Copies of <sup>1</sup>H NMR, <sup>13</sup>C NMR and Mass Spectra for new compounds

Compound 3.

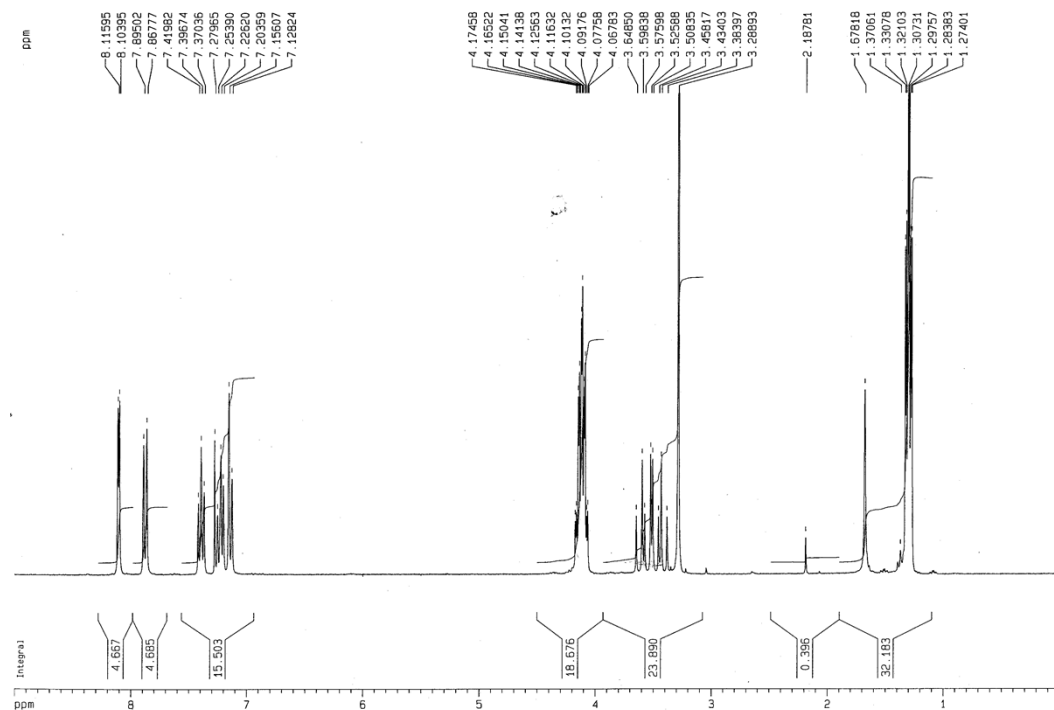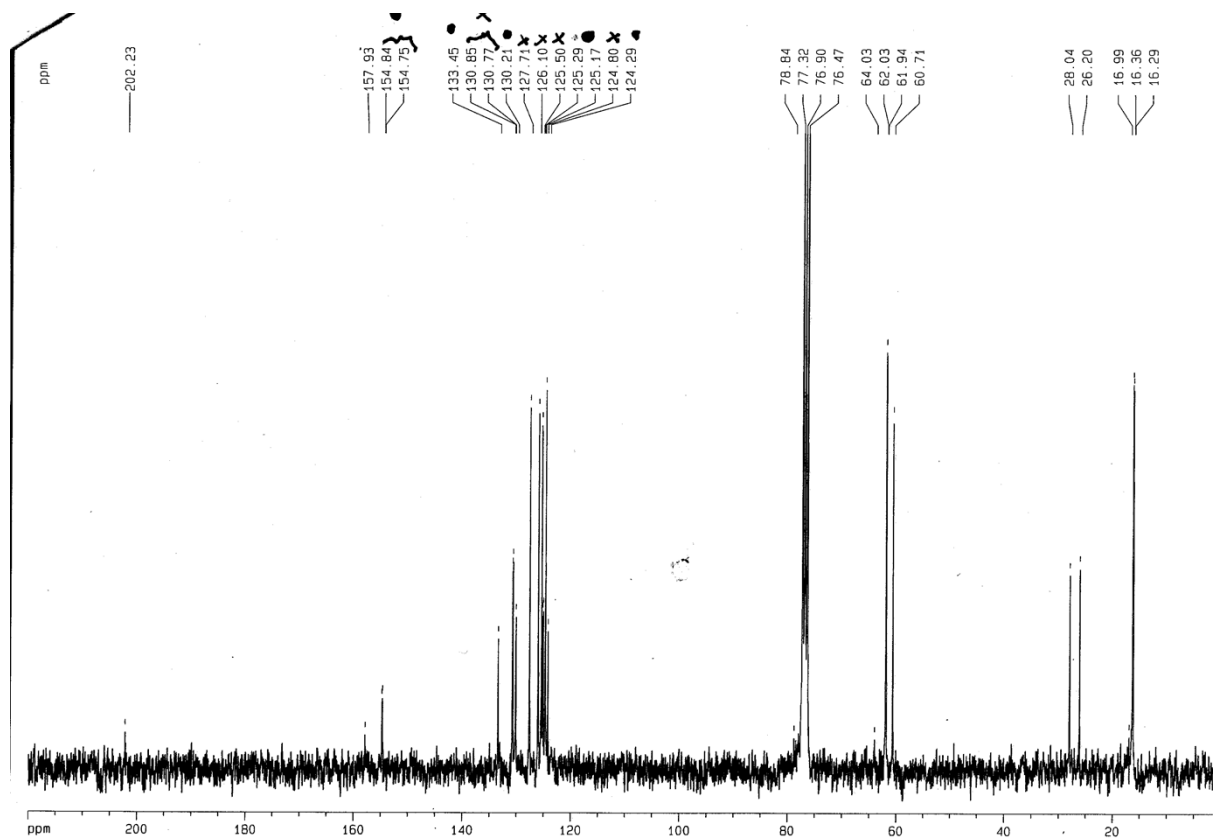

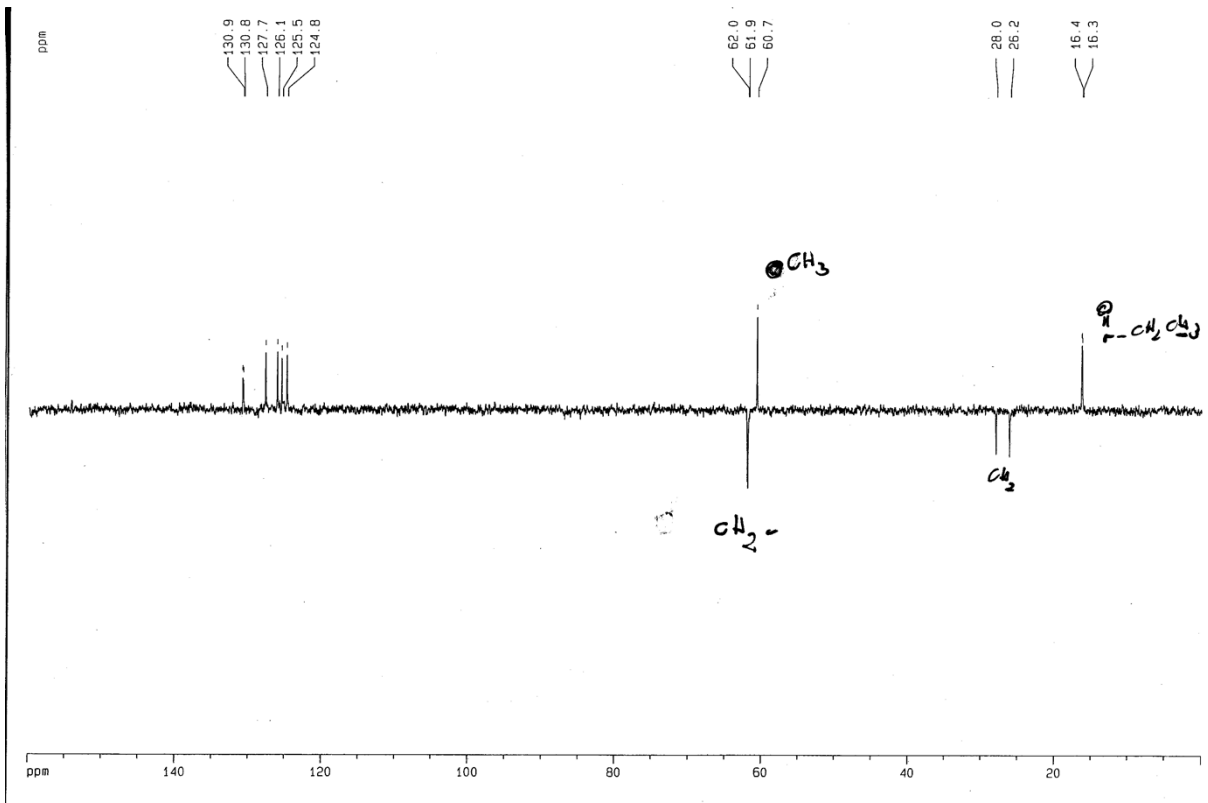

Compound 7.

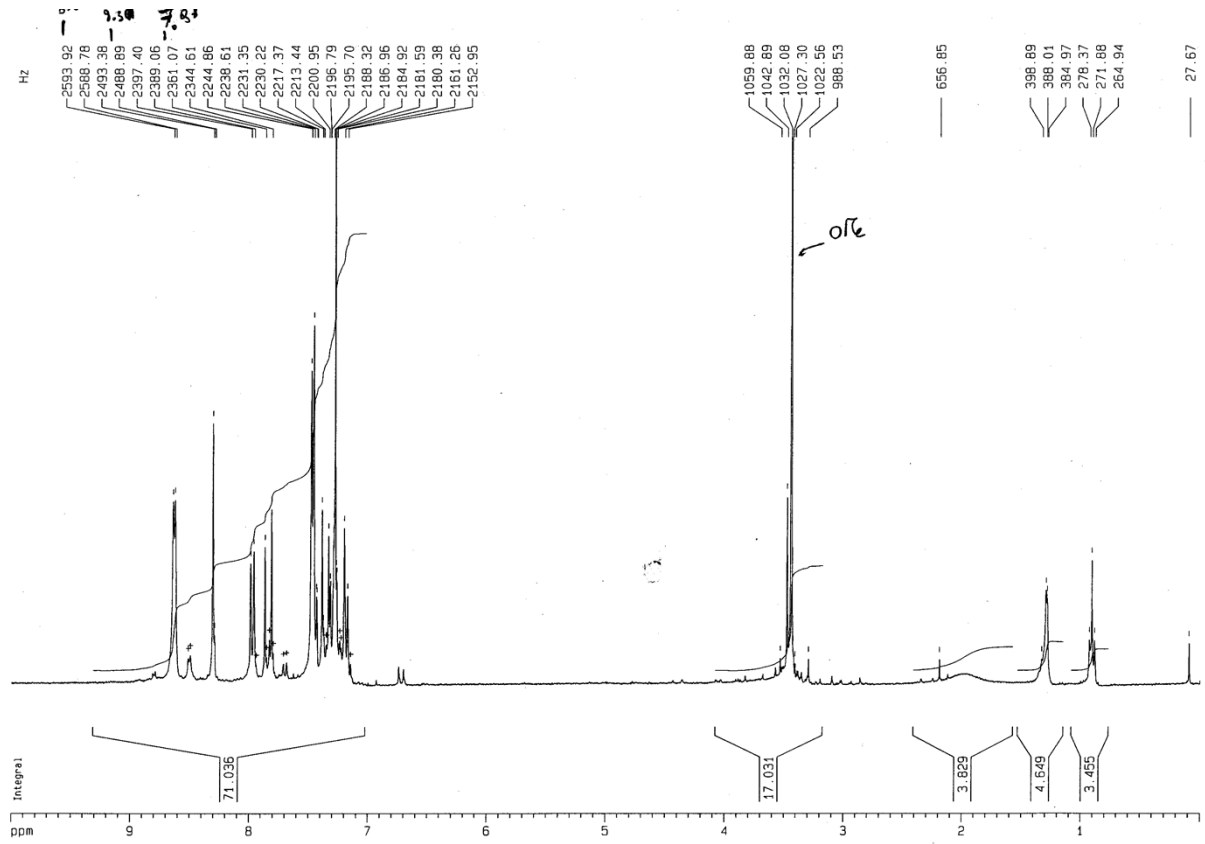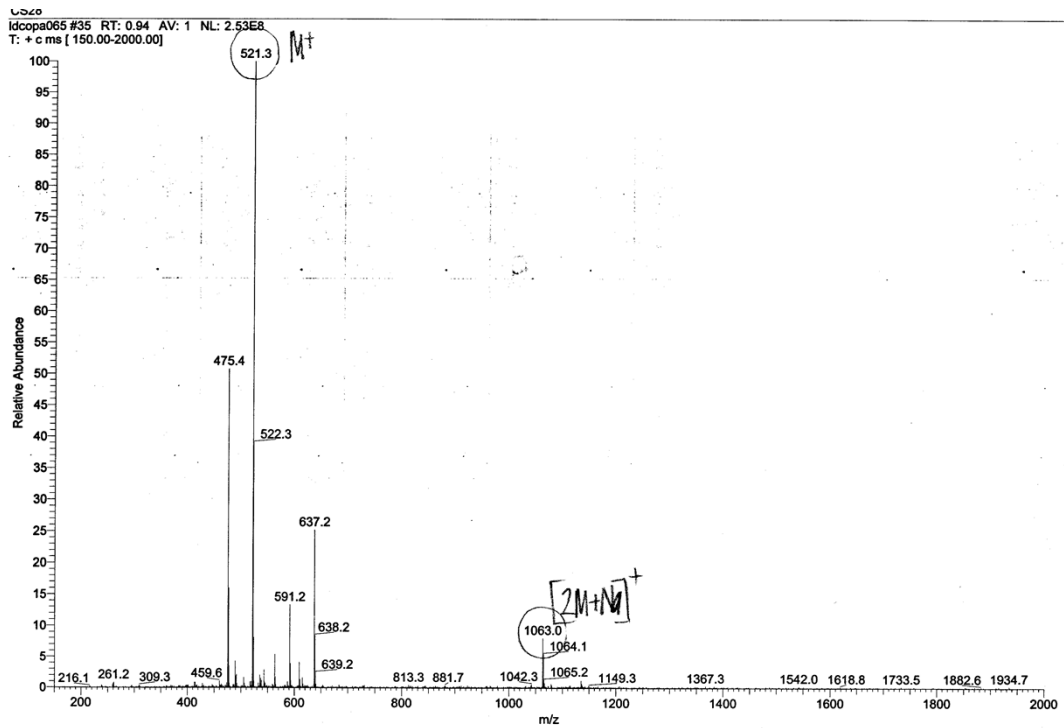

Compound *cis* **9**.

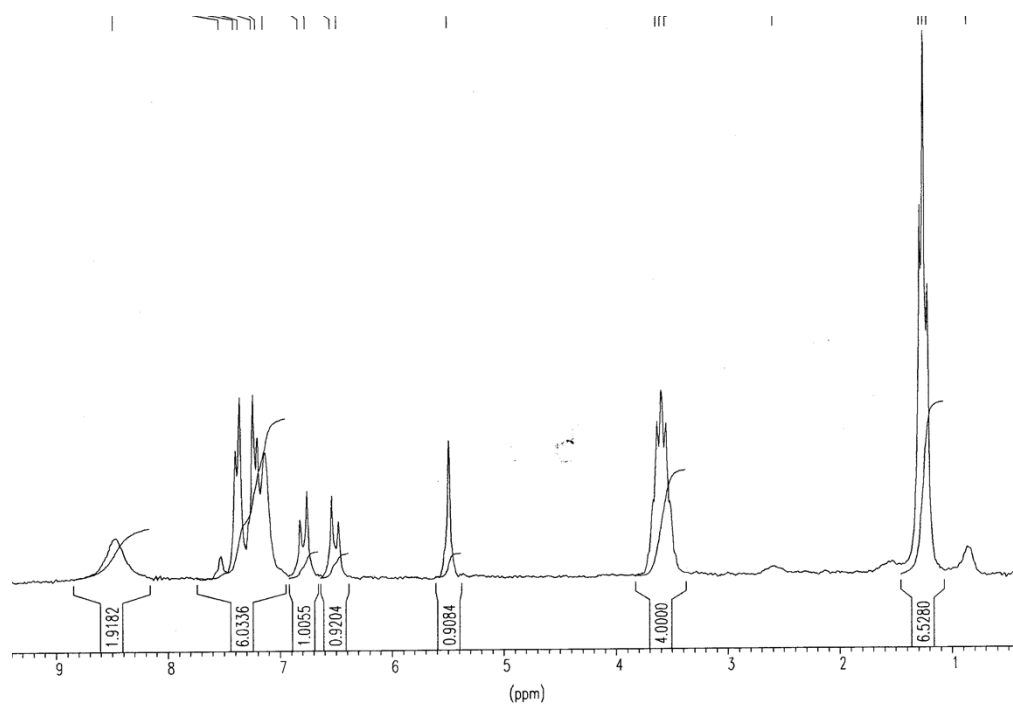

Compound *trans* **9**.

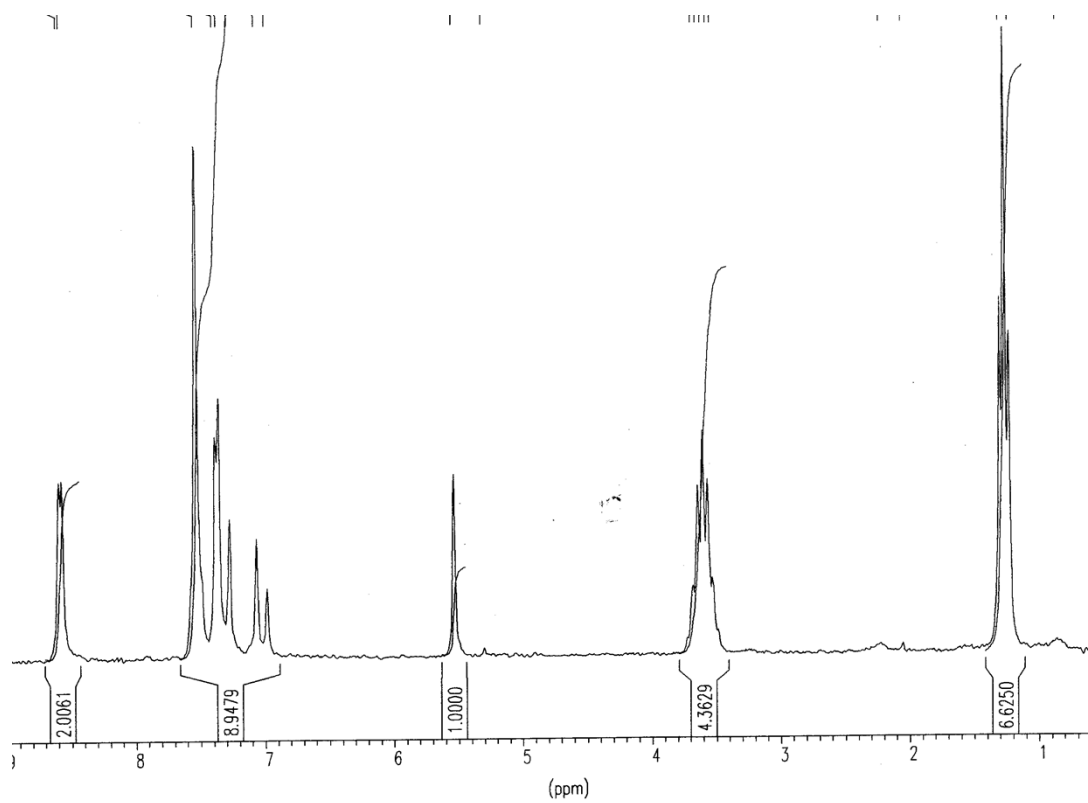



Compound 10.

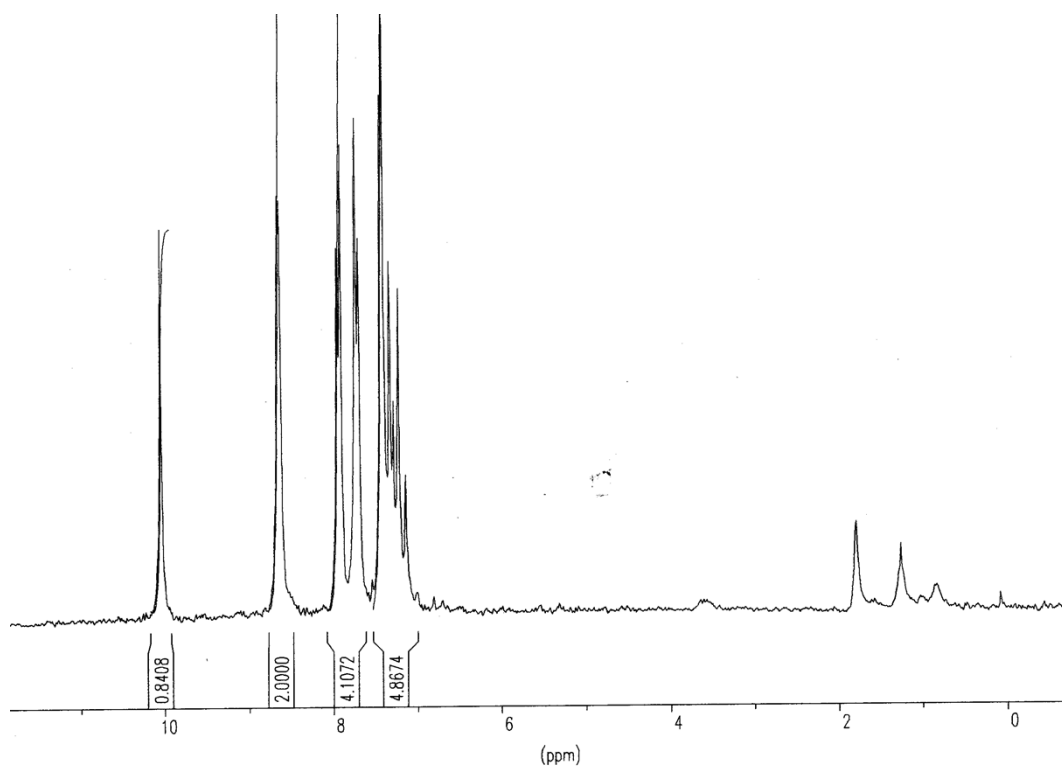

Compound 11.

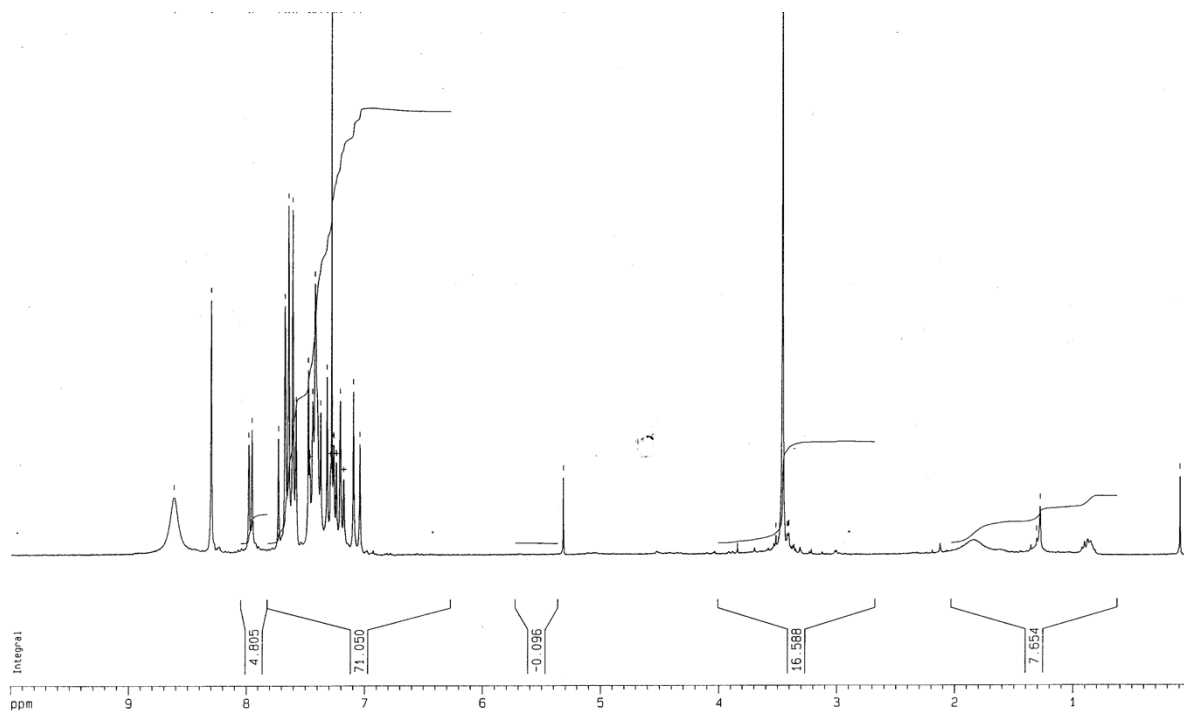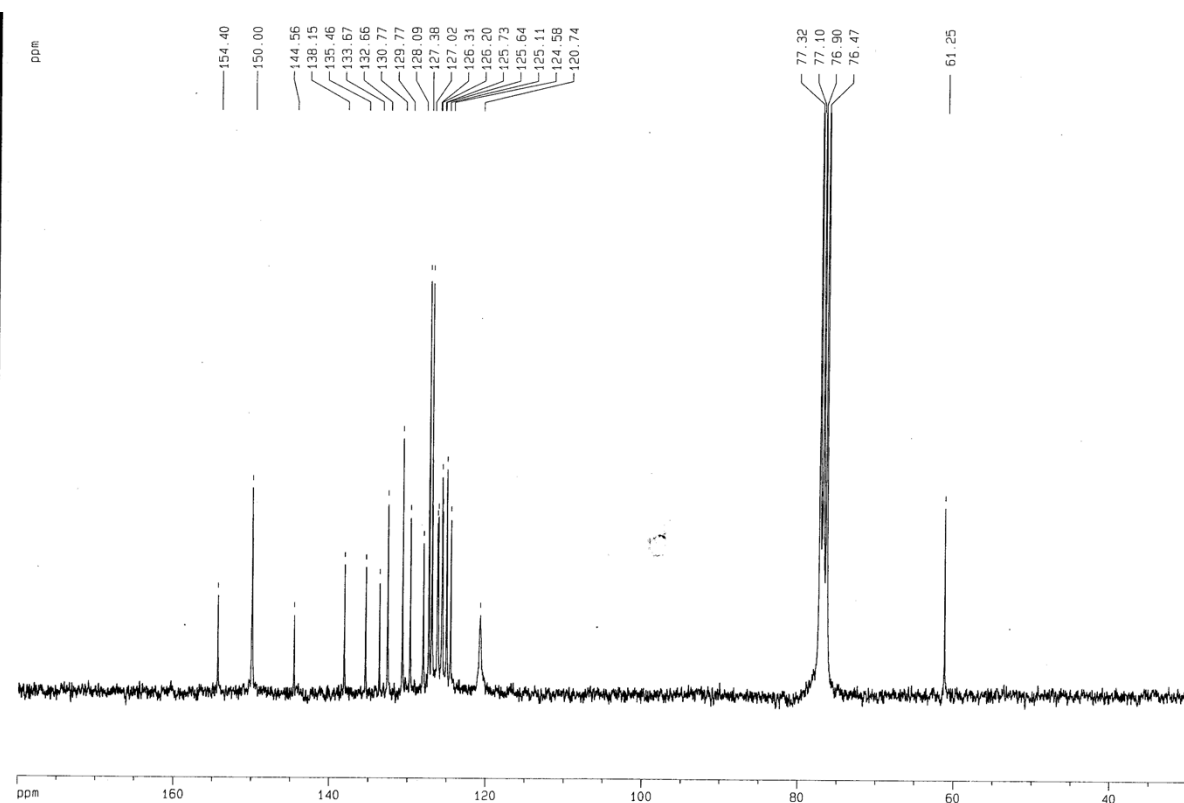

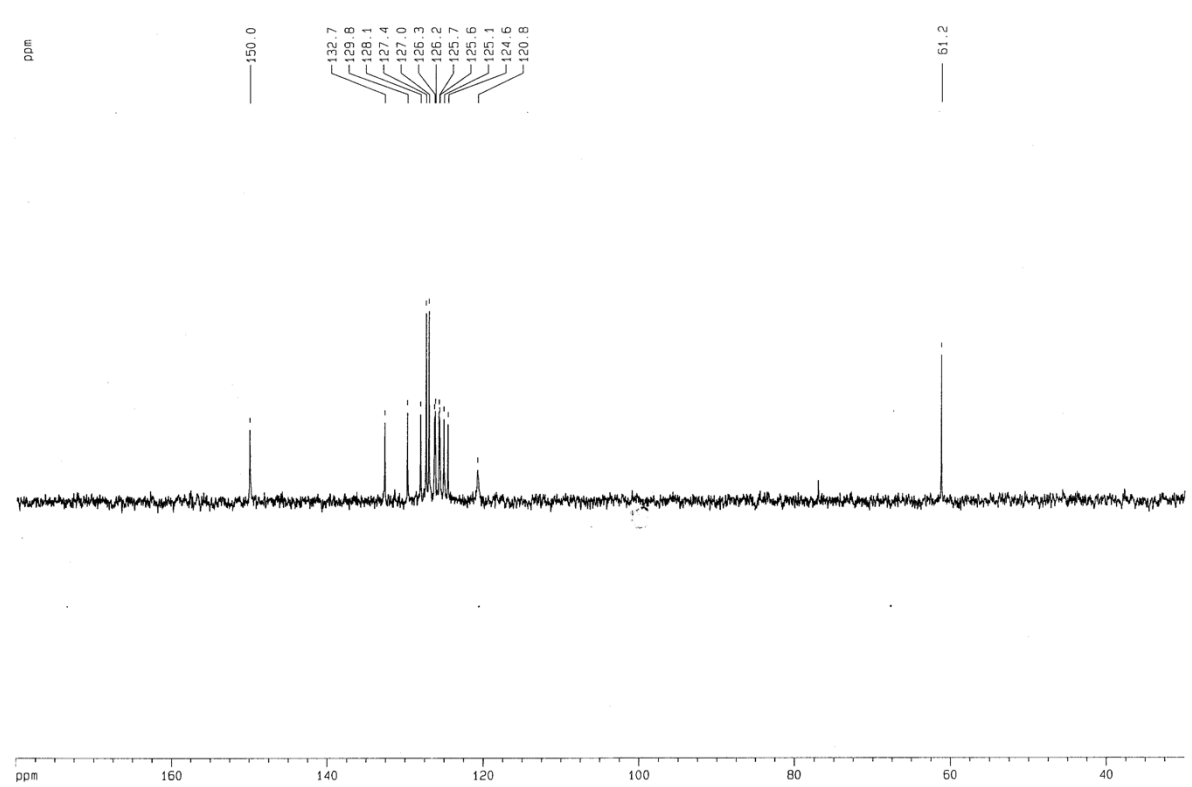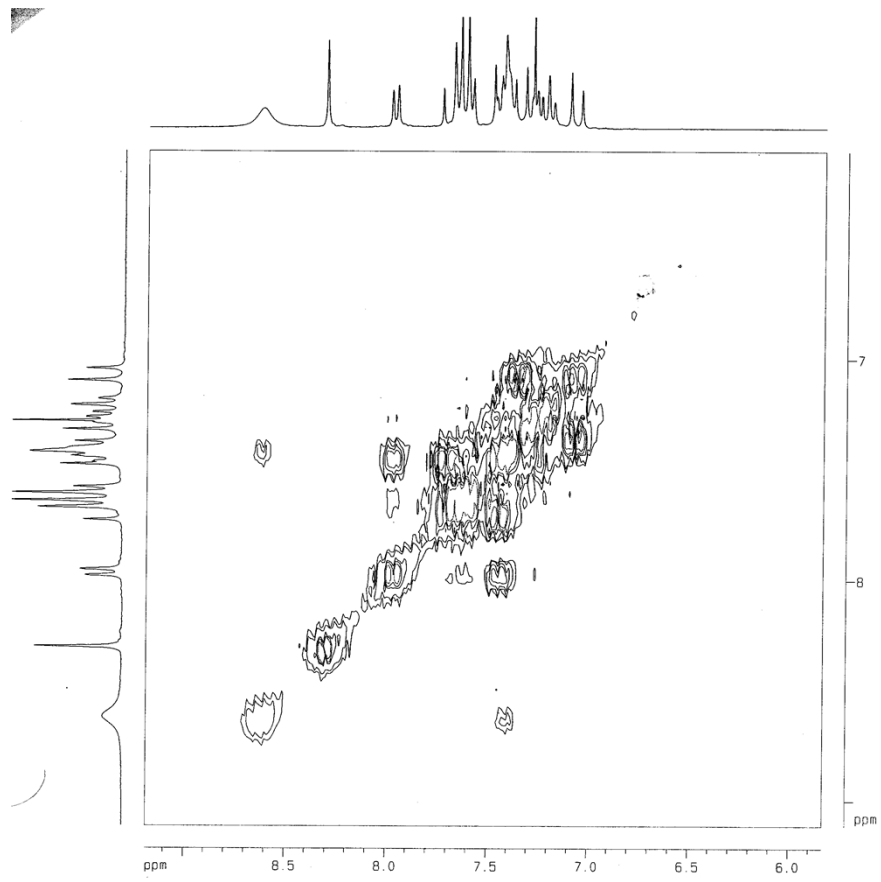

ldcopa094 #1 RT: 0.00 AV: 1 NL: 4.95E4  
T: ITMS + c ESI Full ms [150.00-2000.00]

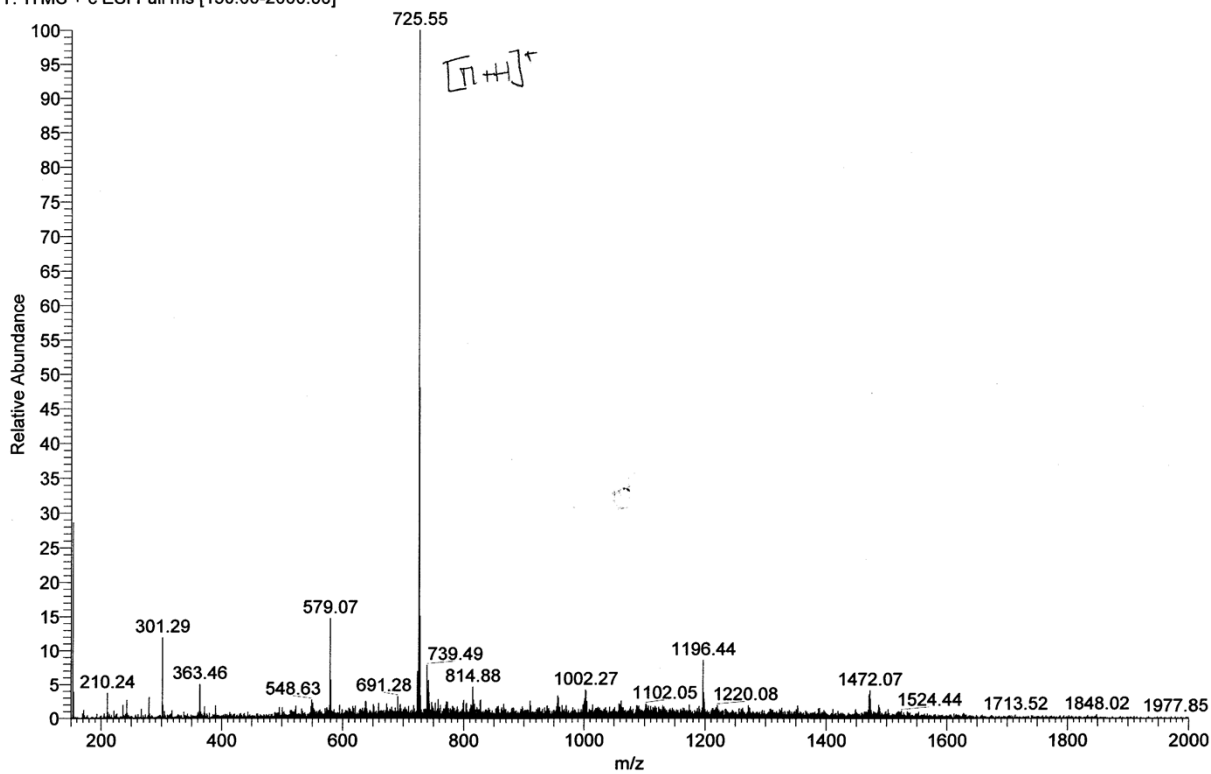

Supplement: c4ra16876c1.pdf [file c4ra16876c1.pdf]
